# Supplementary material for: Curcumin Decreases Hippocampal Neurodegeneration and Nitro-Oxidative Damage to Plasma Proteins and Lipids Caused by Short-Term Exposure to Ozone
Source: MDPI journal article supplement (doi:10.3390/molecules26134075), 2021-07-03
Supplement: s1 [file s1]

# Supplementary material

Table S1. Neurodegenerative changes in CA1 region by silver stain

|         | Intact Control (%) | Curcumin Control (%) | Ozone Control (%) | Curcumin Preventive (%) |
|---------|--------------------|----------------------|-------------------|-------------------------|
| 1 hour  | 0.000 ± 0.000      | 0.000 ± 0.000        | 1.778 ± 0.572     | 0.222 ± 0.147           |
| 2 hours | 0.000 ± 0.000      | 0.000 ± 0.000        | 2.111 ± 0.351     | 0.778 ± 0.401           |
| 4 hours | 0.111 ± 0.111      | 0.111 ± 0.111        | 3.667 ± 0.471     | 1.333 ± 0.408           |
| 8 hours | 0.556 ± 0.242      | 0.444 ± 0.294        | 5.778 ± 0.662     | 2.222 ± 0.641           |

Table S2. Neurodegenerative changes in CA3 region by silver stain

|         | Intact Control (%) | Curcumin Control (%) | Ozone Control (%) | Curcumin Preventive (%) |
|---------|--------------------|----------------------|-------------------|-------------------------|
| 1 hour  | 0.000 ± 0.000      | 0.000 ± 0.000        | 1.667 ± 0.373     | 1.333 ± 0.333           |
| 2 hours | 0.222 ± 0.147      | 0.111 ± 0.111        | 1.778 ± 0.364     | 0.444 ± 0.242           |
| 4 hours | 0.333 ± 0.167      | 0.333 ± 0.167        | 4.556 ± 0.801     | 1.889 ± 0.484           |
| 8 hours | 0.444 ± 0.294      | 0.444 ± 0.242        | 7.667 ± 0.687     | 3.333 ± 0.289           |

Table S3. Neurodegenerative changes in CA1 region by FJC

|         | Intact Control (%) | Curcumin Control (%) | Ozone Control (%) | Curcumin Preventive (%) |
|---------|--------------------|----------------------|-------------------|-------------------------|
| 1 hour  | 0.000 ± 0.000      | 0.111 ± 0.111        | 0.556 ± 0.242     | 0.111 ± 0.111           |
| 2 hours | 0.222 ± 0.147      | 0.333 ± 0.167        | 1.222 ± 0.222     | 0.444 ± 0.176           |
| 4 hours | 0.444 ± 0.176      | 0.222 ± 0.147        | 2.000 ± 0.373     | 0.778 ± 0.324           |
| 8 hours | 0.556 ± 0.176      | 0.333 ± 0.167        | 2.556 ± 0.338     | 0.444 ± 0.176           |

Table S4. Neurodegenerative changes in CA3 region by FJC

|         | Intact Control (%) | Curcumin Control (%) | Ozone Control (%) | Curcumin Preventive (%) |
|---------|--------------------|----------------------|-------------------|-------------------------|
| 1 hour  | 0.111 ± 0.111      | 0.111 ± 0.111        | 0.667 ± 0.236     | 0.111 ± 0.111           |
| 2 hours | 0.222 ± 0.147      | 0.333 ± 0.167        | 1.111 ± 0.261     | 0.222 ± 0.147           |
| 4 hours | 0.222 ± 0.147      | 0.555 ± 0.176        | 1.333 ± 0.287     | 0.556 ± 0.176           |
| 8 hours | 0.670 ± 0.240      | 0.333 ± 0.236        | 1.890 ± 0.350     | 0.440 ± 0.180           |

Table S5A. Plasma level of MDA/4-HNE

|         | Intact Control (nmol/mL) | Curcumin Control (nmol/mL) | Ozone Control (nmol/mL) | Curcumin Preventive (nmol/mL) |
|---------|--------------------------|----------------------------|-------------------------|-------------------------------|
| 1 hour  | 2.491 ± 0.2704           | 2.203 ± 0.174              | 7.291 ± 0.526           | 3.537 ± 0.095                 |
| 2 hours | 1.604 ± 0.076            | 2.374 ± 0.124              | 8.037 ± 0.596           | 2.050 ± 0.152                 |
| 4 hours | 2.591 ± 0.058            | 2.233 ± 0.147              | 8.630 ± 0.498           | 2.849 ± 0.020                 |
| 8 hours | 3.684 ± 0.045            | 1.281 ± 0.124              | 10.7660 ± 0.522         | 2.990 ± 0.200                 |

Table S5B. Plasma level of Carbonyl

|                | Intact Control<br>(nmol/mg) | Curcumin Control<br>(nmol/mg) | Ozone Control<br>(nmol/mg) | Curcumin<br>Preventive<br>(nmol/mg) |
|----------------|-----------------------------|-------------------------------|----------------------------|-------------------------------------|
| <b>1 hour</b>  | 0.249 ± 0.011               | 0.277 ± 0.006                 | 0.519 ± 0.016              | 0.437 ± 0.004                       |
| <b>2 hours</b> | 0.314 ± 0.016               | 0.312 ± 0.008                 | 0.653 ± 0.014              | 0.519 ± 0.007                       |
| <b>4 hours</b> | 0.302 ± 0.014               | 0.324 ± 0.008                 | 0.789 ± 0.006              | 0.538 ± 0.002                       |
| <b>8 hours</b> | 0.377 ± 0.006               | 0.305 ± 0.017                 | 0.993 ± 0.009              | 0.610 ± 0.008                       |

Table S6 Plasma detection of 3-Nitrotyrosine

|                | Intact Control (IOD) | Curcumin Control<br>(IOD) | Ozone Control<br>(IOD) | Curcumin<br>Preventive (IOD) |
|----------------|----------------------|---------------------------|------------------------|------------------------------|
| <b>1 hour</b>  | 756800 ± 114624      | 413800 ± 133372           | 4536000 ± 814242       | 3228000 ± 143997             |
| <b>2 hours</b> | 653000 ± 197026      | 629000 ± 80115            | 4896000 ± 392619       | 4682000 ± 243195             |
| <b>4 hours</b> | 1002000 ± 500746     | 1469000 ± 174584          | 7866000 ± 976533       | 5118000 ± 86059              |
| <b>8 hours</b> | 2382000 ± 282492     | 2419000 ± 413580          | 8024000 ± 146500       | 5188000 ± 247147             |
